# Supplementary material
Source: publisher figshare collection journal article supplement (https://frontiersin.figshare.com/ndownloader/files/29163585)
Supplement: Supplementary file 1 [file 29163585]

Supplementary Material

# Table S1 – The energy density values used for each prey type in the bioenergetic models as derived from the literature. Where multiple sources provide an energy density value for one prey type, a mean was taken.

| **Prey Type** | **Energy density (kJ/g)** | **Source** |
| --- | --- | --- |
| Polychaeta | 3.3052 | Tyler (1973); Blaber and Bulman (1987); Vedel and Riisgaard (1993); Ciancio et al. (2007) |
| Other Decapoda | 3.5253 | Blaber and Bulman (1987); (Ciancio et al., 2007); Meynier et al. (2008); McCluskey et al. (2016) |
| Penaeidae | 3.8400 | Lawson et al. (2018) |
| Other Metazoa | 3.2274 | (mean of all animals) |
| Amphipoda | 2.6295 | Tyler (1973); Boates and Smith (1979); Davis et al. (1998); Ciancio et al. (2007); James et al. (2012) |
| Maxillopoda | 2.6230 | Davis et al. (1998) |
| Plants | 1.3323 | Montgomery and Gerking (1980); Pirc (1989); McDermid et al. (2007) |
| Other Crustacea | 3.2527 | (mean of all crustacea) |
| Other Malacostraca | 3.6455 | Blaber and Bulman (1987); Davis et al. (1998); Gray (2005); Ciancio et al. (2007) |
| Teleost | 4.2450 | Healey (1972); McCluskey et al. (2016) |
| Cnidaria | 1.2660 | Blaber and Bulman (1987); Davis et al. (2012) |
| Bivalvia | 3.9497 | Cameron et al. (1979); Brey et al. (1988); Dauvin and Joncourt (1989); Ciancio et al. (2007); Gopalakrishnan and Vijayavel (2009) |
| Gastropoda | 4.1175 | Grahame (1973); Grahame (1977); Blaber and Bulman (1987); Brey et al. (1988) |
| Diptera | 6.5633 | Cummins (1967); Tomberlin et al. (2002); James et al. (2012) |
| Other Insecta | 6.6630 | Golley (1961); Wiegert (1965); Cummins (1967); Naess et al. (1975); James et al. (2012) |
| Arachnida | 6.3719 | Cummins (1967); Naess et al. (1975); James et al. (2012), |
| Squamata | 5.9325 | Kitchell and Windell (1972) |

**References**

Barkai, R. 1987. An energy budget for the South African abalone Haliotis Midae. University of Cape Town.

Beers, J. R. 1966. Studies on the chemical composition of the major zooplankton groups in the sargasso sea off Bermuda 1. Limnology and Oceanography, 11: 520-528.

Blaber, S. J. M., and Bulman, C. M. 1987. Diets of fishes of the upper continental slope of eastern Tasmania: content, calorific values, dietary overlap and trophic relationships. Marine Biology, 95: 345-356.

Boates, J. S., and Smith, P. C. 1979. Length-weight relationships, energy content and the efforts of predation on *Corophium volutator* (Pallas)(Crustacea: amphipoda). Proceedings of the Nova Scotian Institute of Science, 29.

Brey, T., Rumohr, H., and Ankar, S. 1988. Energy content of macrobenthic invertebrates: general conversion factors from weight to energy. Journal of Experimental Marine Biology and Ecology, 117: 271-278.

Cameron, C., Cameron, I., and Paterson, C. 1979. Contribution of organic shell matter to biomass estimates of unionid bivalves. Canadian Journal of Zoology, 57: 1666-1669.

Ciancio, J. E., Pascual, M. A., and Beauchamp, D. A. 2007. Energy density of Patagonian aquatic organisms and empirical predictions based on water content. Transactions of the American Fisheries Society, 136: 1415-1422.

Cummins, K. W. 1967. Calorific equivalents for studies in ecological energetics. University of Pittsburgh, Pennsylvania.

Dauvin, J. C., and Joncourt, M. 1989. Energy values of marine benthic invertebrates from the western English Channel. Journal of the Marine Biological Association of the United Kingdom, 69: 589-595.

Davis, A. M., Blanchette, M. L., Pusey, B. J., Jardine, T. D., and Pearson, R. G. 2012. Gut content and stable isotope analyses provide complementary understanding of ontogenetic dietary shifts and trophic relationships among fishes in a tropical river. Freshwater Biology, 57: 2156-2172.

Davis, N., Myers, K., and Ishida, Y. 1998. Caloric value of high-seas salmon prey organisms and simulated salmon ocean growth and prey consumption. North Pacific Anadromous Fish Commission Bulletin, 1: 146-162.

Golley, F. B. 1961. Energy values of ecological materials. Ecology, 42: 581-584.

Gopalakrishnan, S., and Vijayavel, K. 2009. Nutritional composition of three estuarine bivalve mussels, *Perna viridis,* *Donax cuneatus* and *Meretrix meretrix*. Int J Food Sci Nutr, 60: 458-463.

Grahame, J. 1973. Breeding energetics of *Littorina littorea* (L.)(Gastropoda: prosobranchiata). The Journal of Animal Ecology: 391-403.

Grahame, J. 1977. Reproductive effort and r-and K-selection in two species of Lacuna (Gastropoda: Prosobranchia). Marine Biology, 40: 217-224.

Gray, A. 2005. The Salmon River estuary: restoring tidal inundation and tracking ecosystem response*,* University of Washington Seattle, WA.

Healey, M. 1972. Bioenergetics of a sand goby (*Gobius minutus*) population. Journal of the Fisheries Board of Canada, 29: 187-194.

James, D. A., Csargo, I. J., Von Eschen, A., Thul, M. D., Baker, J. M., Hayer, C. A., Howell, J., et al. 2012. A generalized model for estimating the energy density of invertebrates. Freshwater Science, 31: 69-77.

Kitchell, J. F., and Windell, J. T. 1972. Energy budget for the lizard, *Anolis carolinensis*. Physiological Zoology, 45: 178-188.

Lawson, C. L., Suthers, I. M., Smith, J. A., Schilling, H. T., Stewart, J., Hughes, J. M., and Brodie, S. 2018. The influence of ontogenetic diet variation on consumption rate estimates: a marine example. Sci Rep, 8: 10725.

McCluskey, S. M., Bejder, L., and Loneragan, N. R. 2016. Dolphin prey availability and calorific value in an estuarine and coastal environment. Frontiers in Marine Science, 3: 30.

McDermid, K. J., Stuercke, B., and Balazs, G. H. 2007. Nutritional composition of marine plants in the diet of the green sea turtle (*Chelonia mydas*) in the Hawaiian Islands. Bulletin of Marine Science, 81: 55-71.

Meynier, L., Morel, P. C. H., Mackenzie, D. D. S., Macgibbon, A., Chilvers, B. L., and Duignan, P. J. 2008. Proximate composition, energy content, and fatty acid composition of marine species from Campbell Plateau, New Zealand. New Zealand Journal of Marine and Freshwater Research, 42: 425-437.

Montgomery, W. L., and Gerking, S. D. 1980. Marine macroalgae as foods for fishes: an evaluation of potential food quality. Environmental Biology of Fishes, 5: 143-153.

Naess, S., Steigen, A., and Solhøy, T. 1975. Standing crop and calorific content in invertebrates from Hardangervidda. *In* Fennoscandian Tundra Ecosystems, pp. 151-159. Springer.

Pirc, H. 1989. Seasonal changes in soluble carbohydrates, starch, and energy content in Mediterranean seagrasses. Marine Ecology, 10: 97-105.

Tomberlin, J. K., Sheppard, D. C., and Joyce, J. A. 2002. Selected life-history traits of black soldier flies (Diptera: Stratiomyidae) reared on three artificial diets. Annals of the Entomological Society of America, 95: 379-386.

Tyler, A. 1973. Caloric values of some North Atlantic invertebrates. Marine Biology, 19: 258-261.

Vedel, A., and Riisgaard, H. U. 1993. Filter-feeding in the polychaete *Nereis diversicolor*: growth and bioenergetics. Marine Ecology Progress Series, 100: 145-145.

Wuenschel, M.J., Jugovich, A.R. and Hare, J.A., 2006. Estimating the energy density of fish: the importance of ontogeny. Transactions of the American Fisheries Society, 135(2): 379-385.

Wiegert, R. G. 1965. Energy dynamics of the grasshopper populations in old field and alfalfa field ecosystems. Oikos: 161-176.
